# Supplementary material for: T-cell Intracellular Antigen (TIA)-Proteins Deficiency in Murine Embryonic Fibroblasts Alters Cell Cycle Progression and Induces Autophagy
Source: PubMed Central journal article supplement (PMC3782481; doi:10.1371/journal.pone.0075127), 2013-09-24

## QPCR - Primers

| <u>Gene</u> | <u>Forward</u>           | <u>Reverse</u>           | <u>Product length (bp)</u> |
|-------------|--------------------------|--------------------------|----------------------------|
| ARG2        | TGATGCATTTGACCCTAAACTG   | ATCCAGAGCTGACAGCAACC     | 124                        |
| EREG        | TGACAGTGATTCTCATTTTCCTG  | TTCATATTCCTCCCTCGATTT    | 111                        |
| FBN2        | TCAATGGCTACACCAAGAAAGAT  | TGGGCTGTCCATGGCTAC       | 110                        |
| GAPDH       | CTCCCCTCTTCCACCTTCG      | CATACCAGGAAATGAGCTTGACAA | 77                         |
| HMGA2       | AAGGCAGCAAAAACAAGAGC     | CCGTTTTTCTCCAATGGTCT     | 68                         |
| MEST        | CTCTGTCTGTCTCGAATGGAGGT  | CGTCTTTGAGGAGCTTTTGG     | 73                         |
| SFRP1       | ATGTGCTCCAGAAGCAGACC     | GTCAGAGCAGCCAACATGC      | 60                         |
| SFRP2       | AAACCCTTTGTAAAAATGACTTCG | CAGCTTGTAATGGTCTTGCTC    | 113                        |
| TIA1        | AGTTCCATGAGCACCGTCAT     | TGTTGCCCAATTCACCTTCA     | 92                         |
| TIAR        | GGAACCAACAAGGATTTGGA     | GAGGAGGCTGAGCACCAA       | 75                         |
| XIST        | CTACTGCTCCTCCGTTACATCA   | AGGAGCACAAAACAGACTCCA    | 74                         |

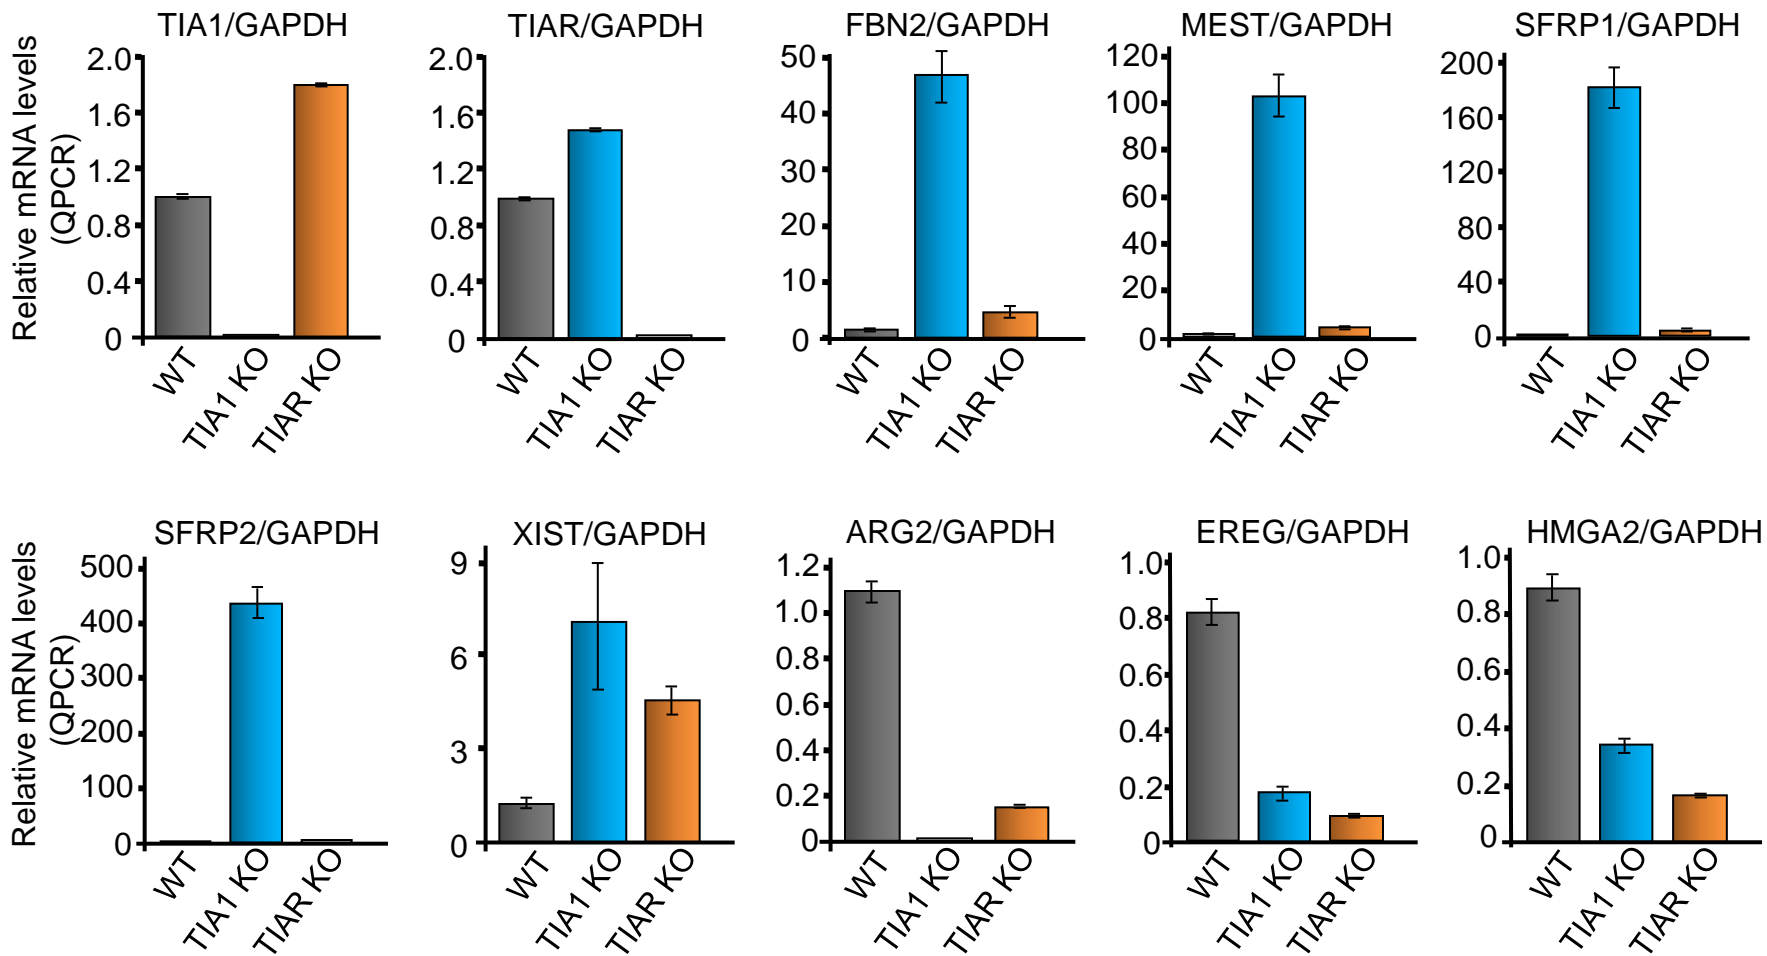

Supplement: pone.0075127.s006.pdf [file pone.0075127.s006.pdf]
