# Supplementary material for: T-cell Intracellular Antigen (TIA)-Proteins Deficiency in Murine Embryonic Fibroblasts Alters Cell Cycle Progression and Induces Autophagy
Source: PubMed Central journal article supplement (PMC3782481; doi:10.1371/journal.pone.0075127), 2013-09-24
Supplement: pone.0075127.s008.pdf [file pone.0075127.s008.pdf]

**Electron microscopy (12,000x)**  
**WT MEF**

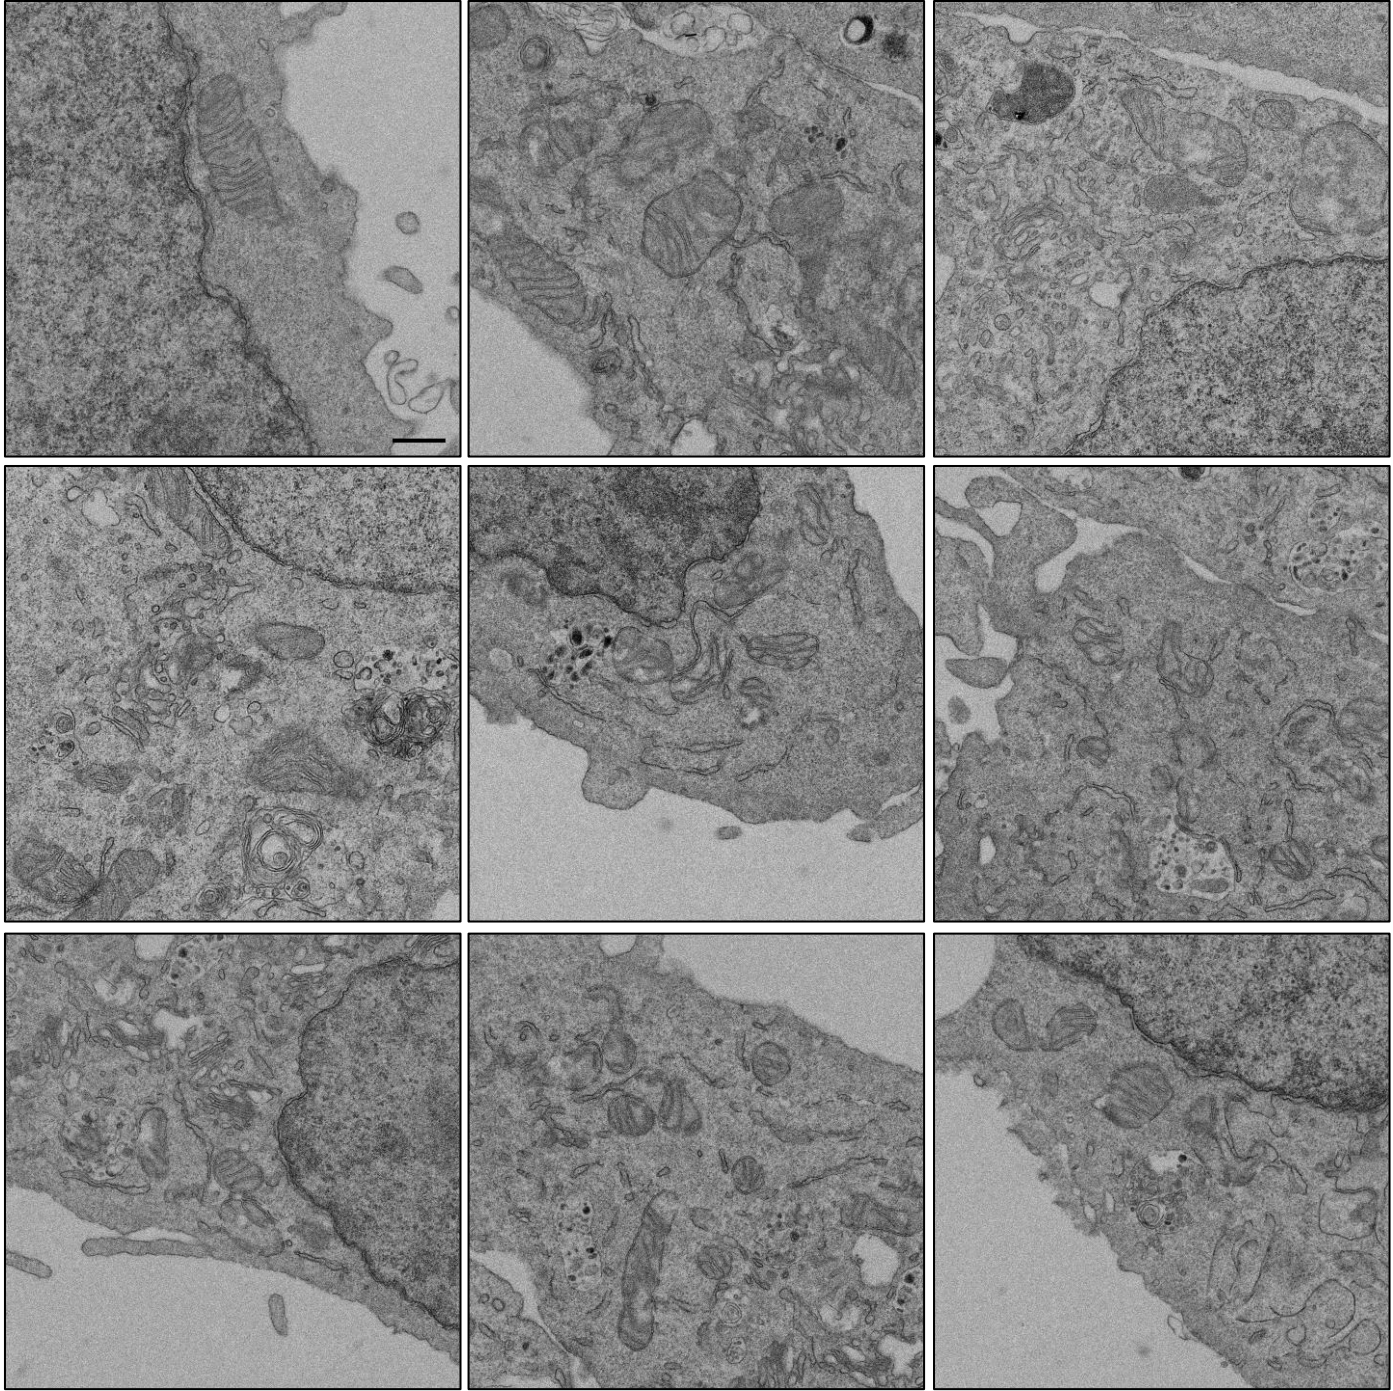

Scale bar = 500 nm

**Electron microscopy (12,000x)**  
**TIA1 KO MEF**

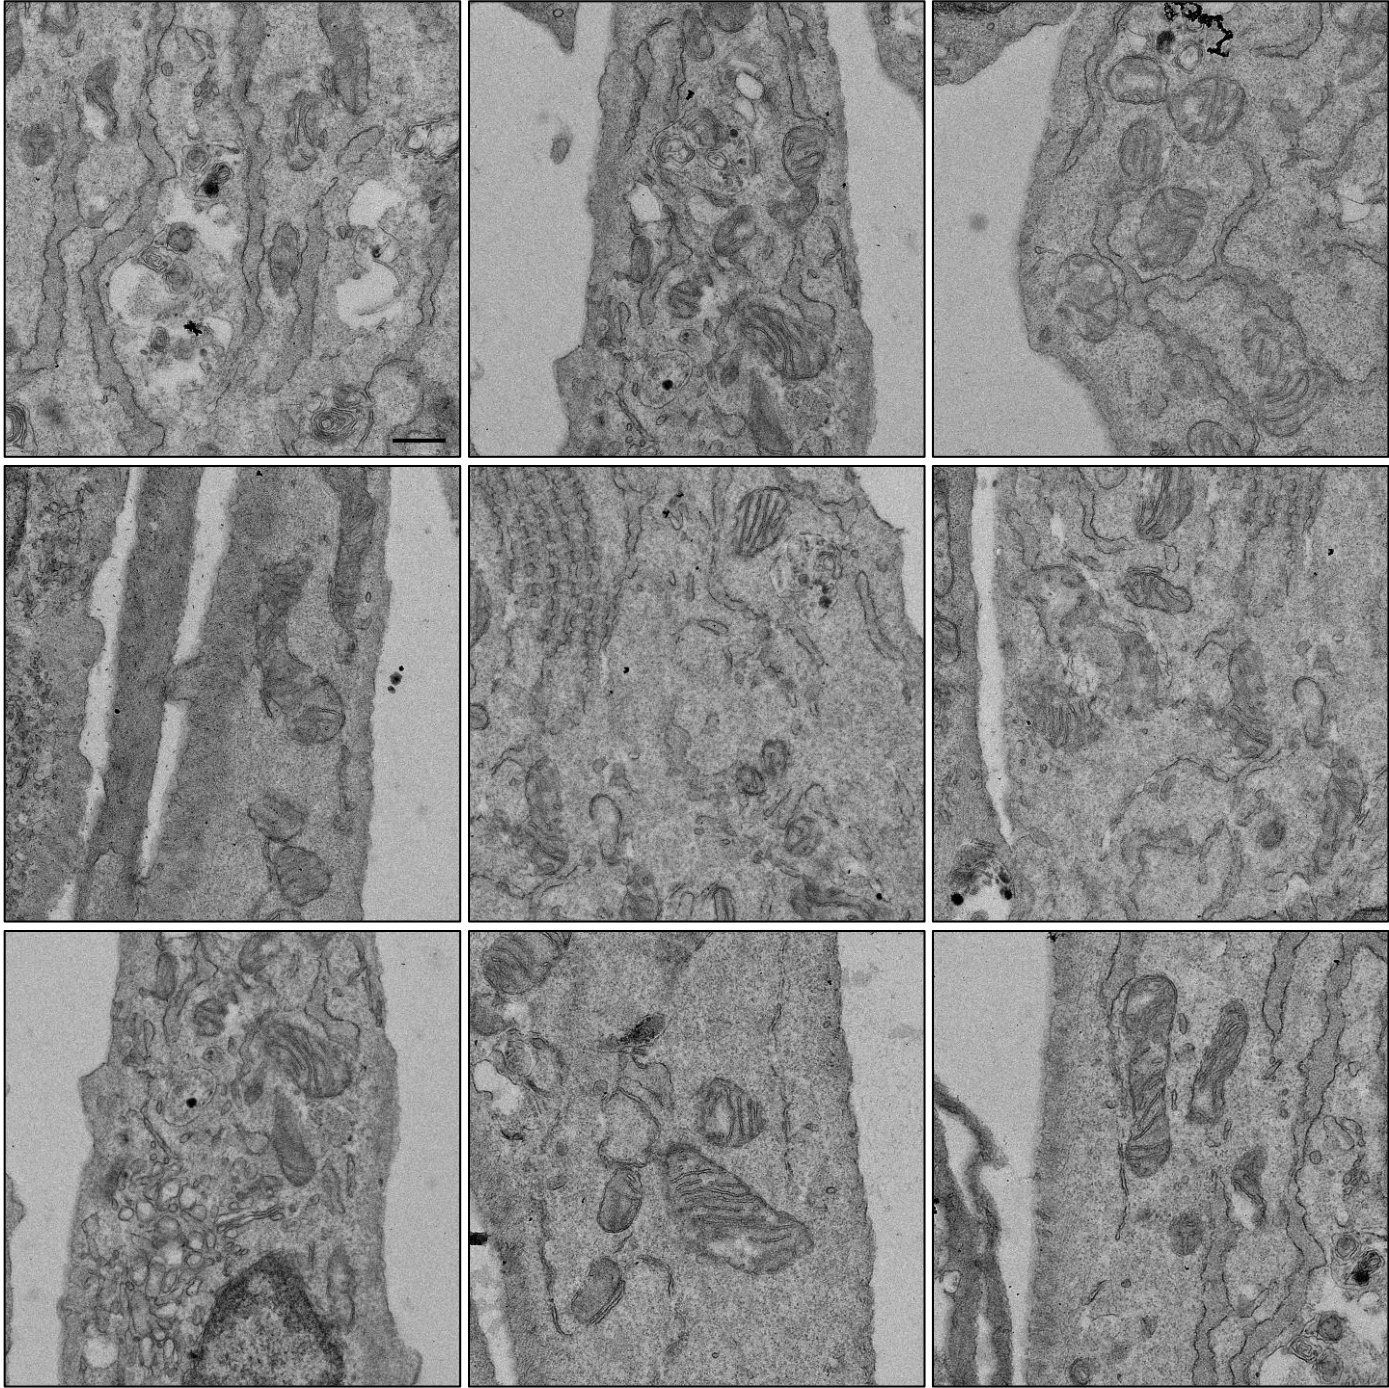

Scale bar = 500 nm

# Electron microscopy (12,000x) TIAR KO MEF

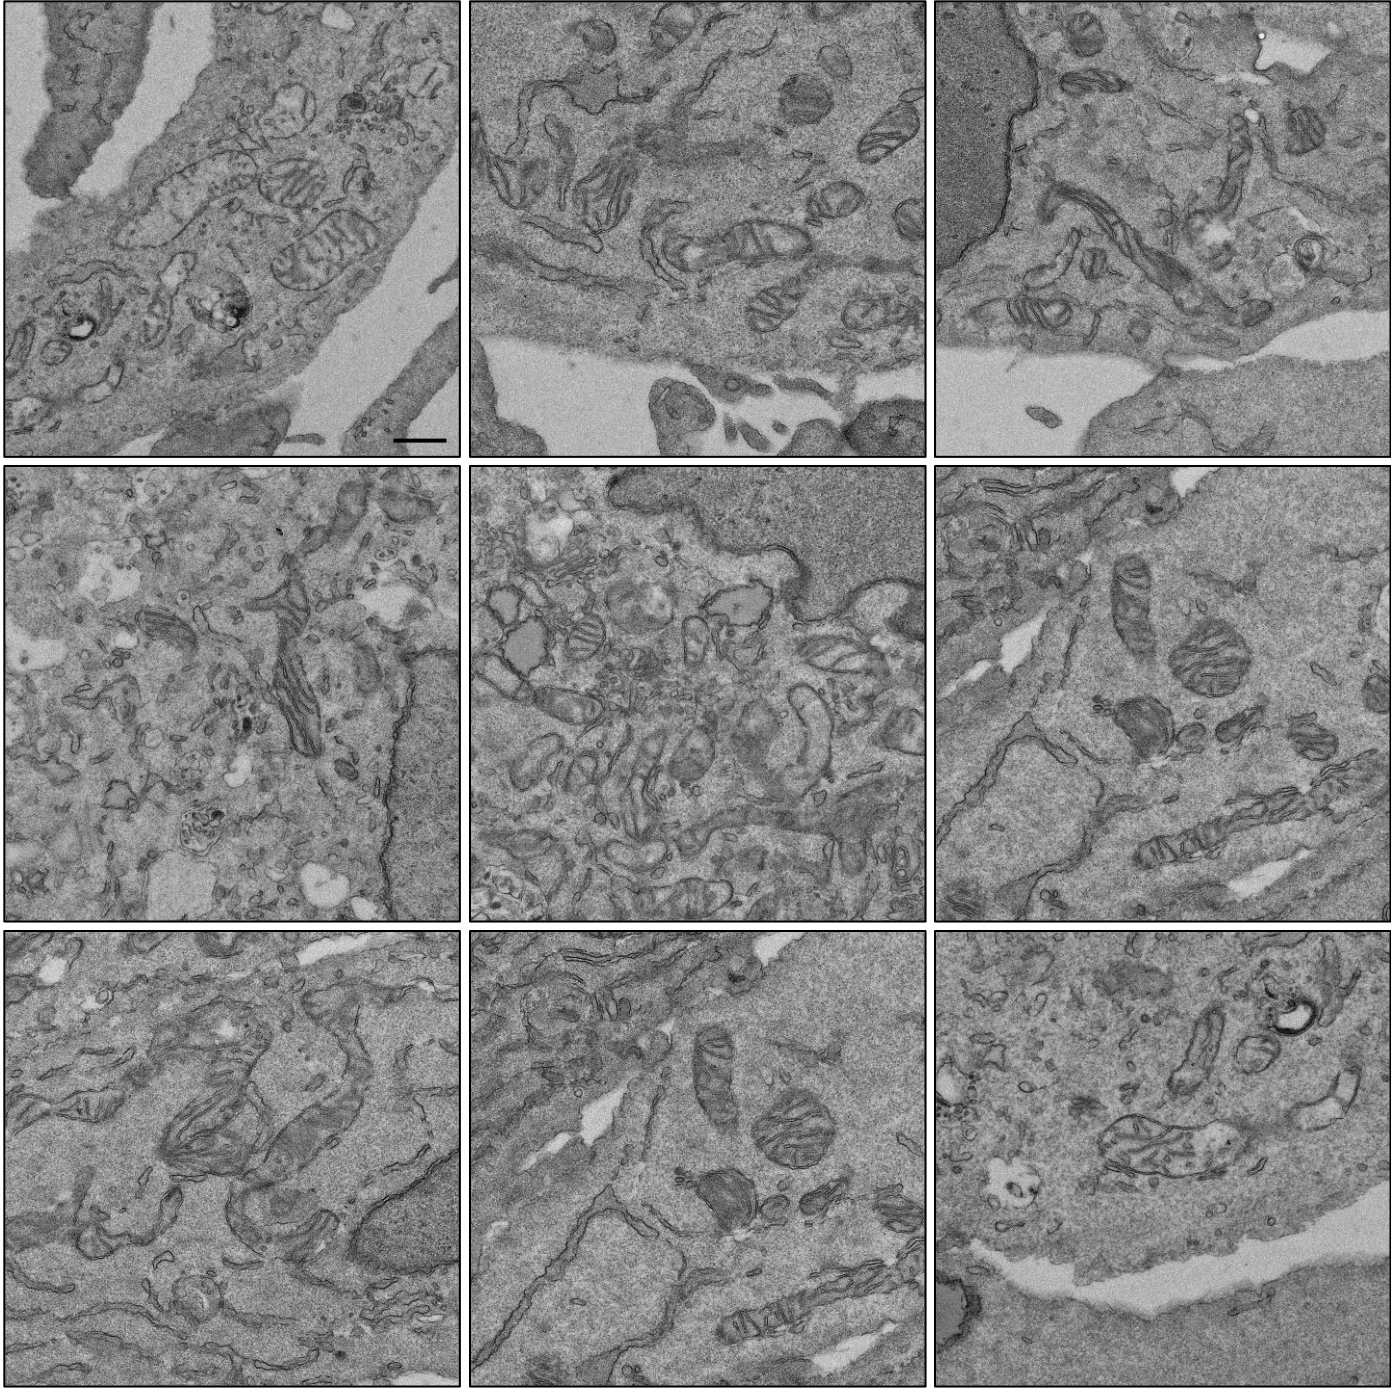

Scale bar = 500 nm
