# Supplementary material for: T-cell Intracellular Antigen (TIA)-Proteins Deficiency in Murine Embryonic Fibroblasts Alters Cell Cycle Progression and Induces Autophagy
Source: PubMed Central journal article supplement (PMC3782481; doi:10.1371/journal.pone.0075127), 2013-09-24

**A**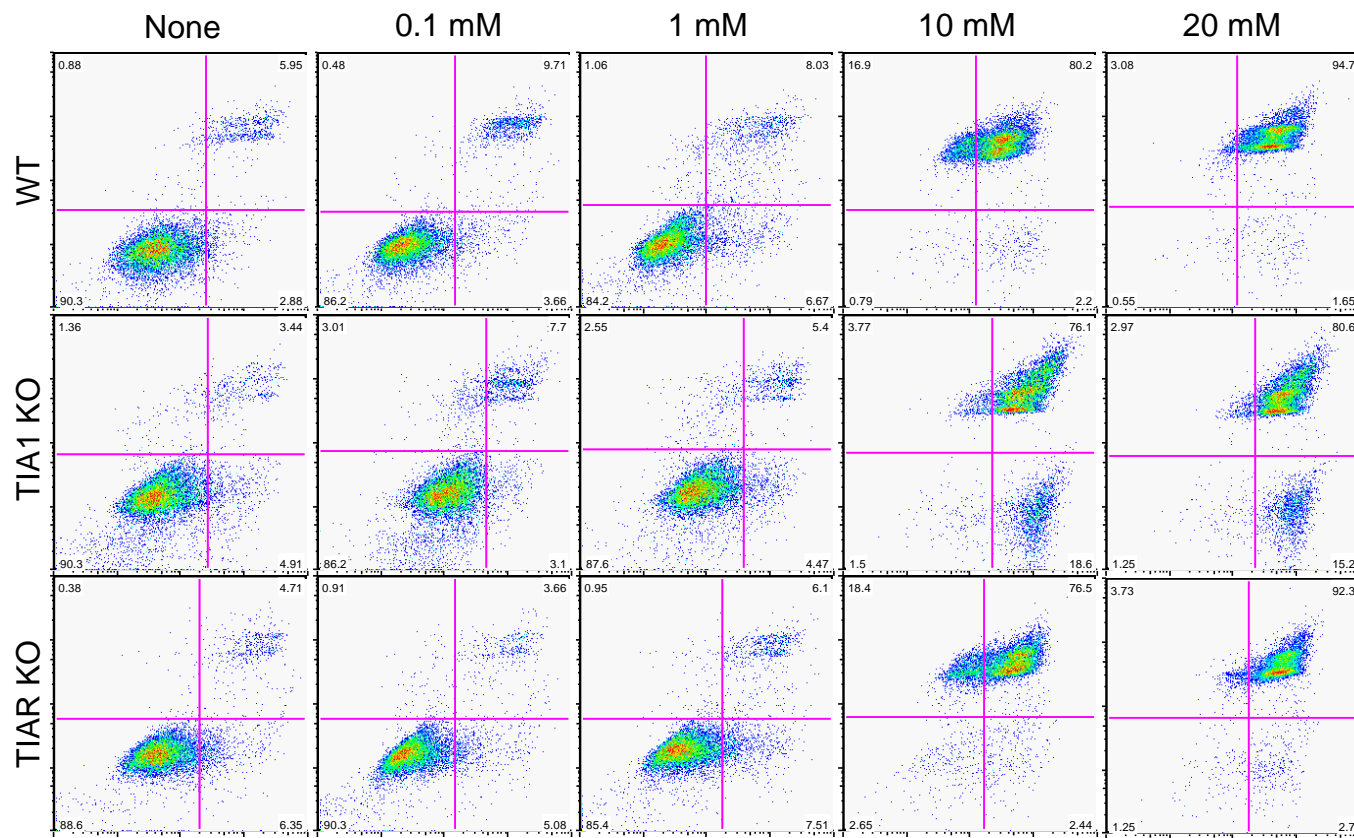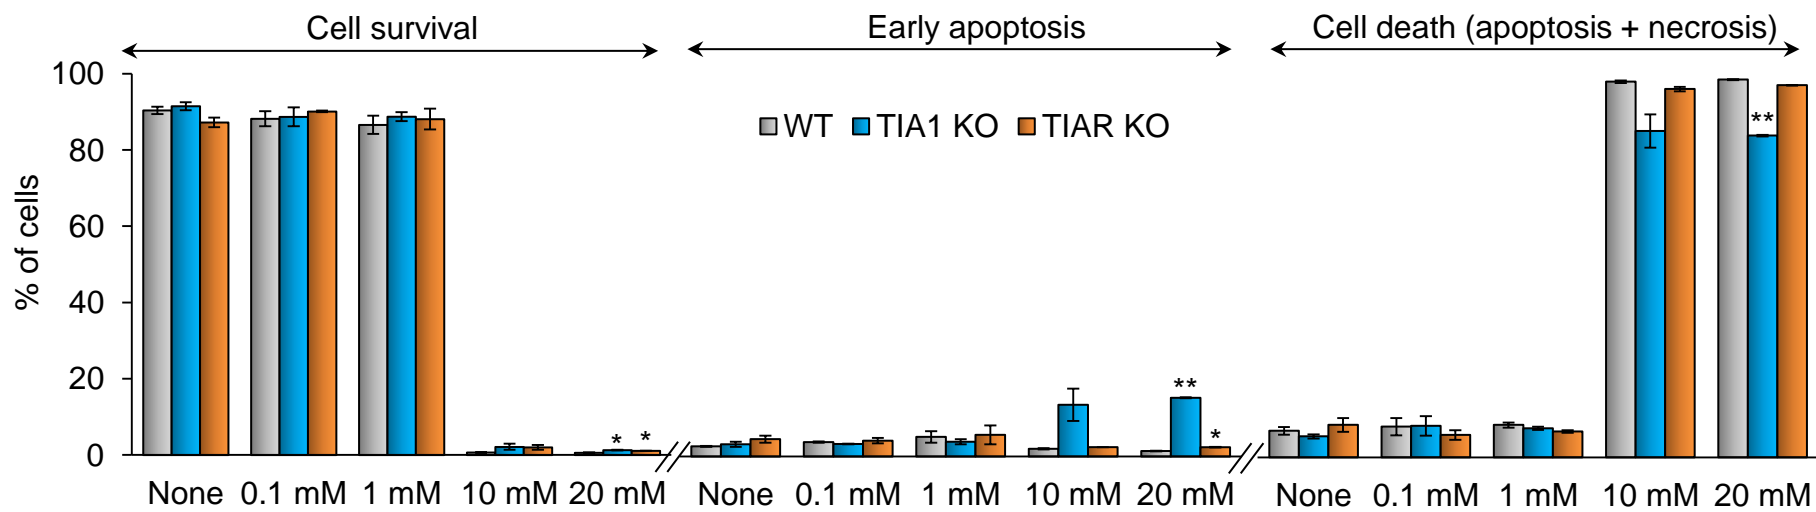

**B**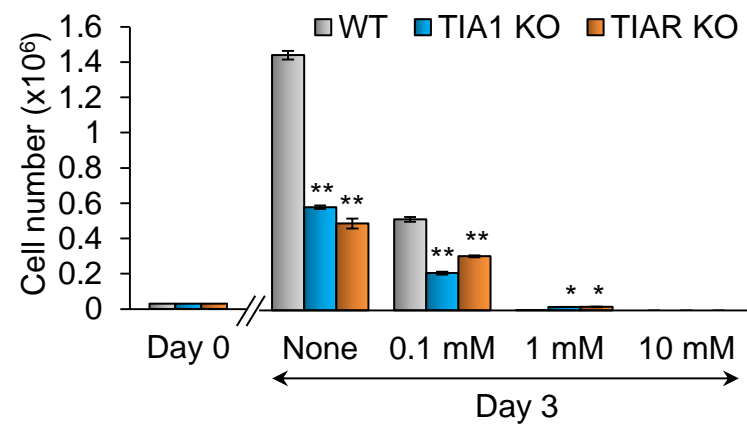**C**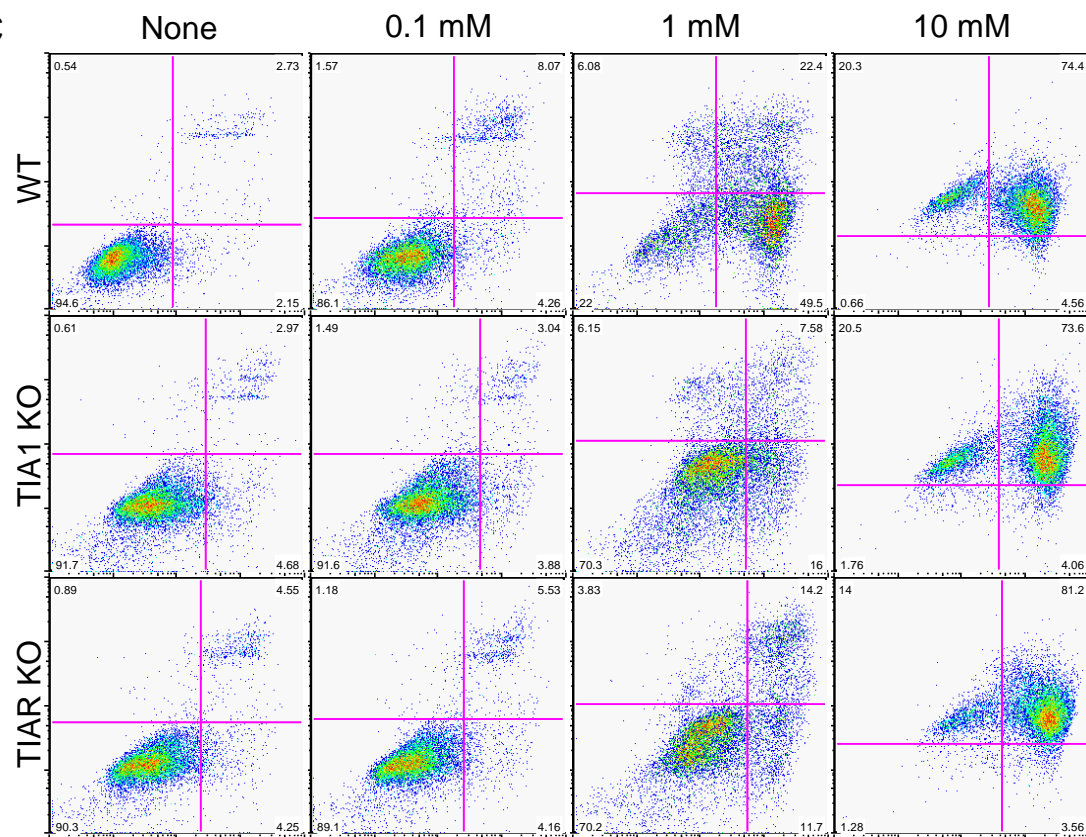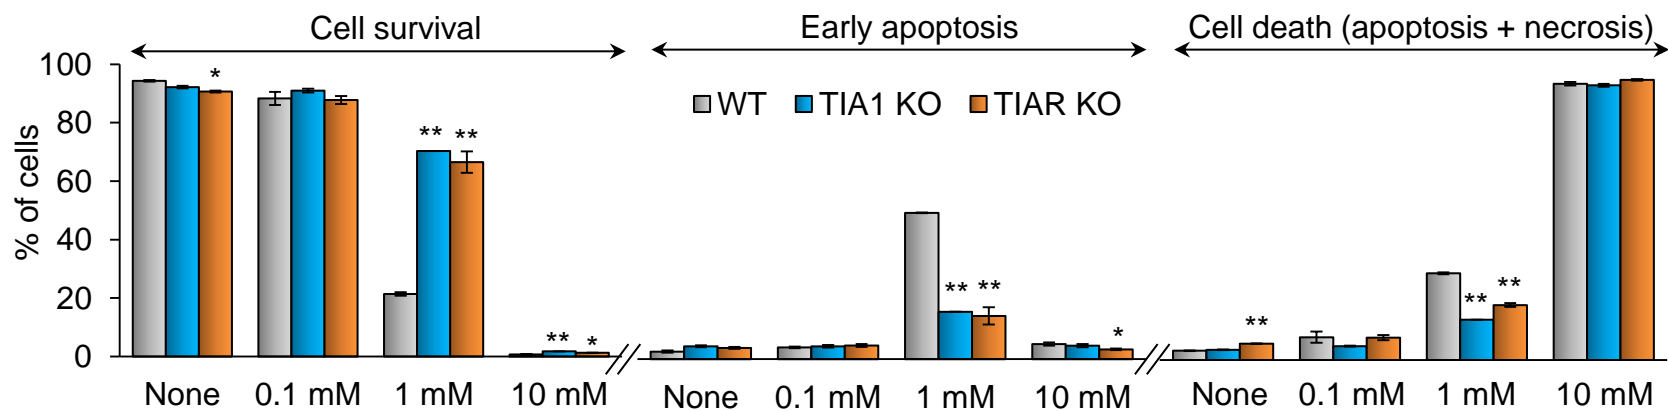

Supplement: pone.0075127.s009.pdf [file pone.0075127.s009.pdf]
